# Supplementary material
Source: PubMed Central journal article supplement (PMC5687509)

**A**

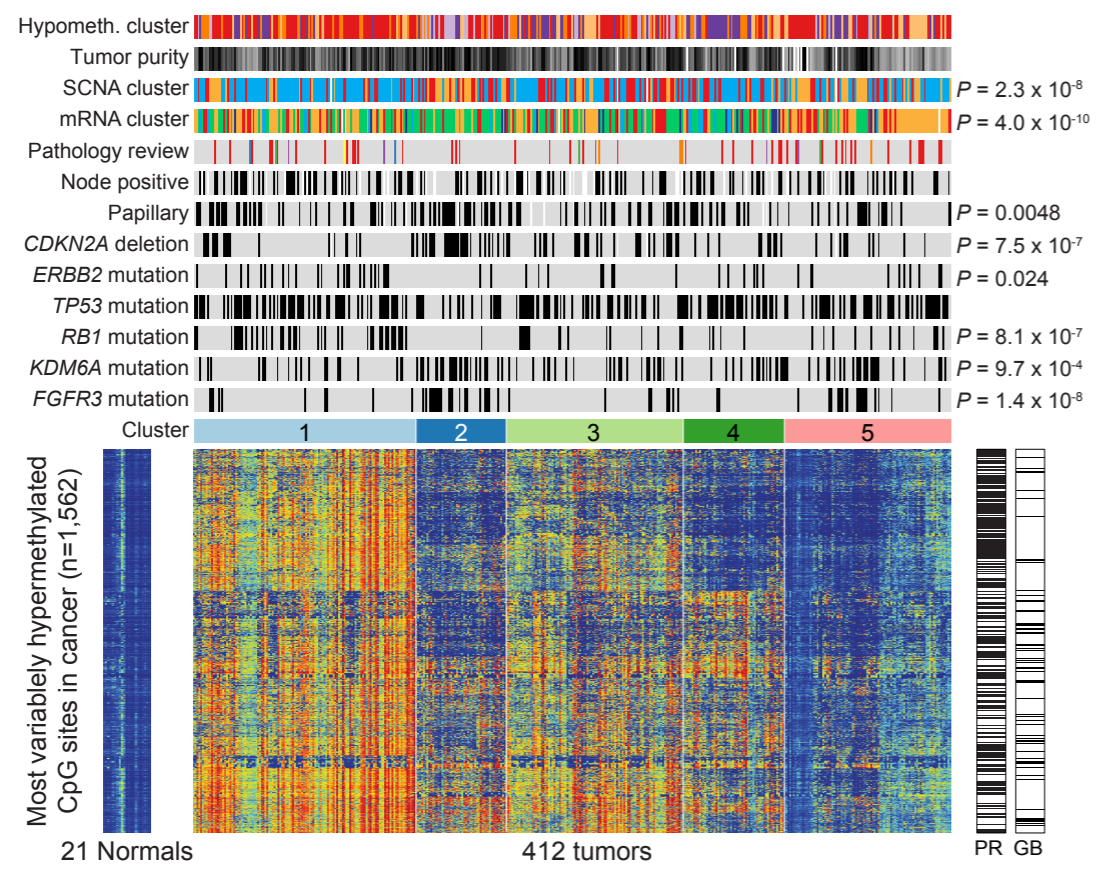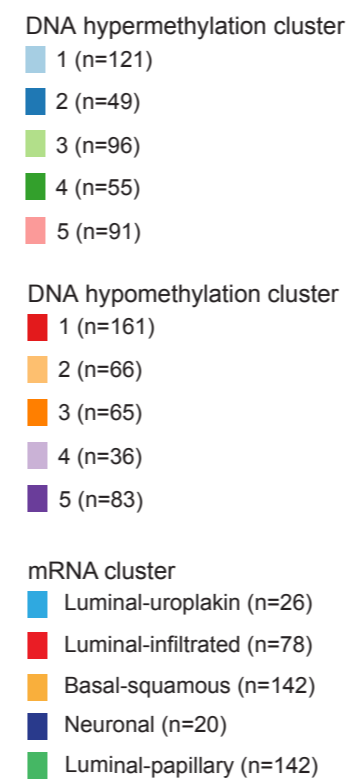

**G**

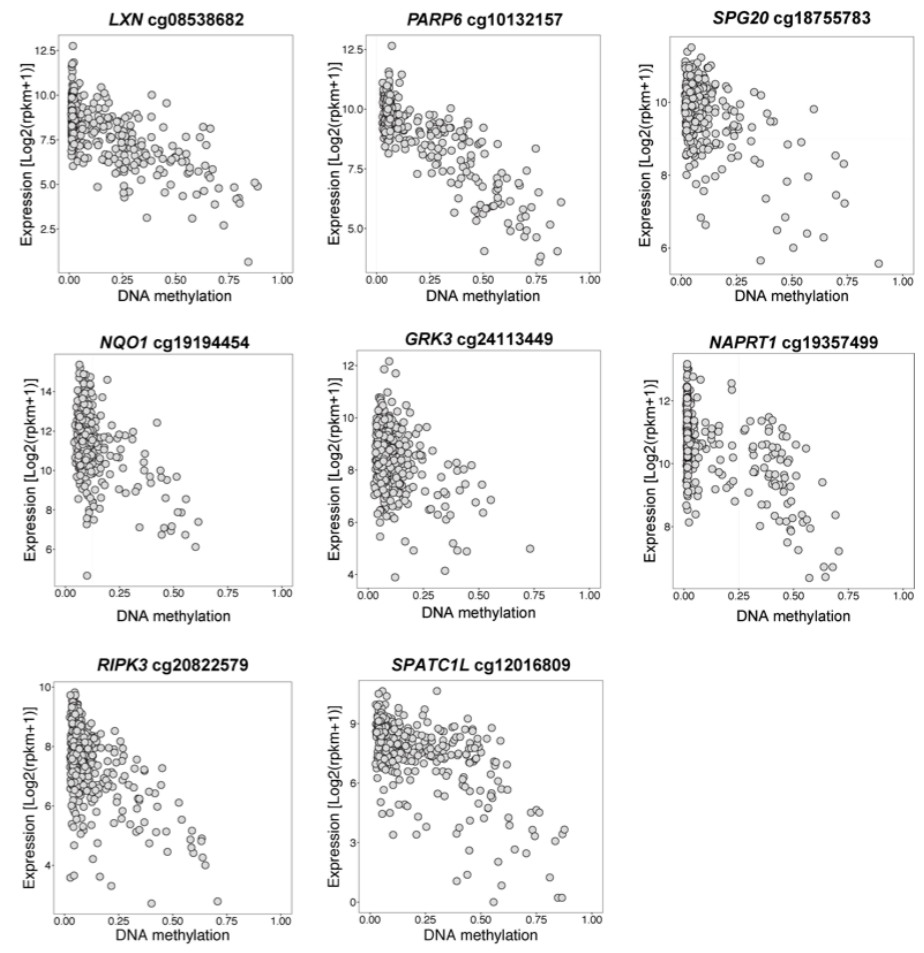

**B**

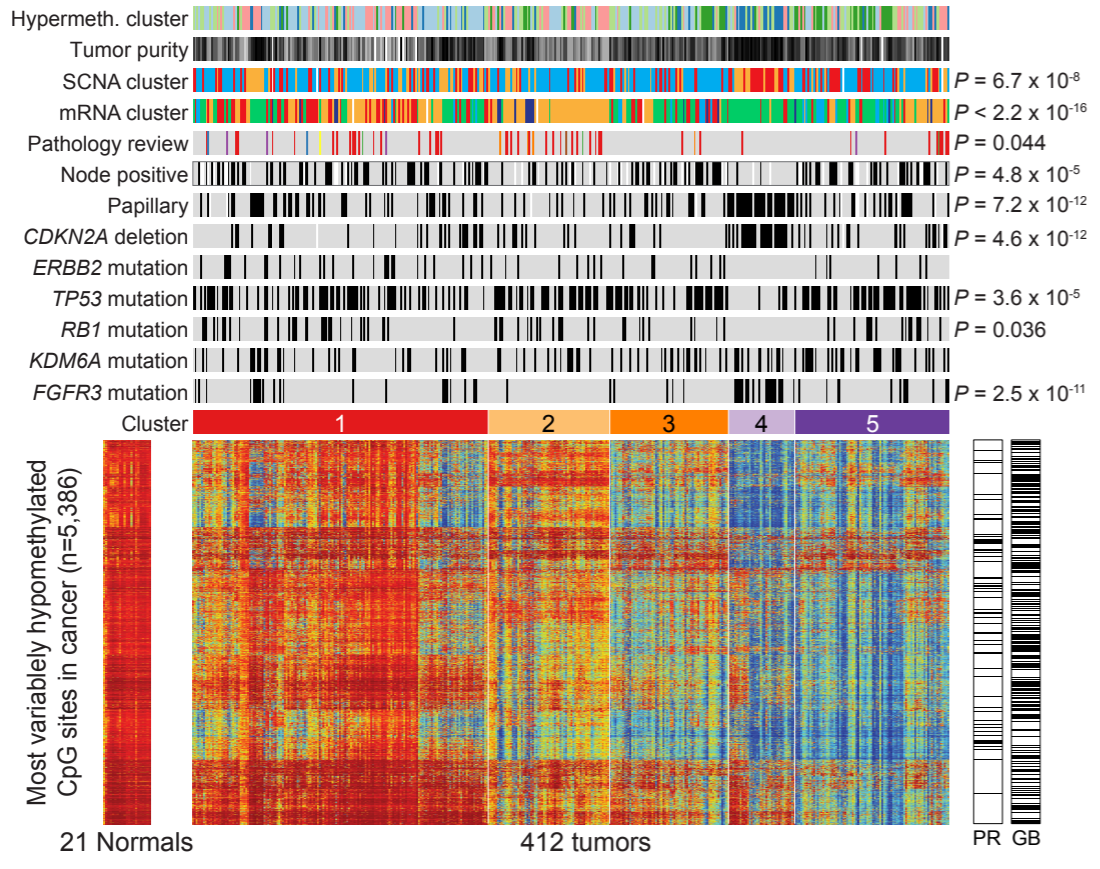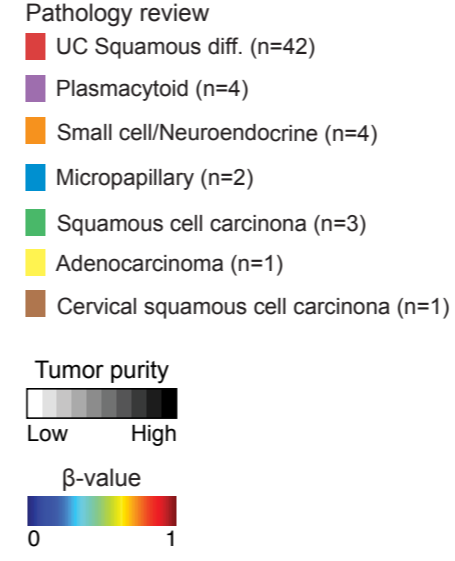

**H**

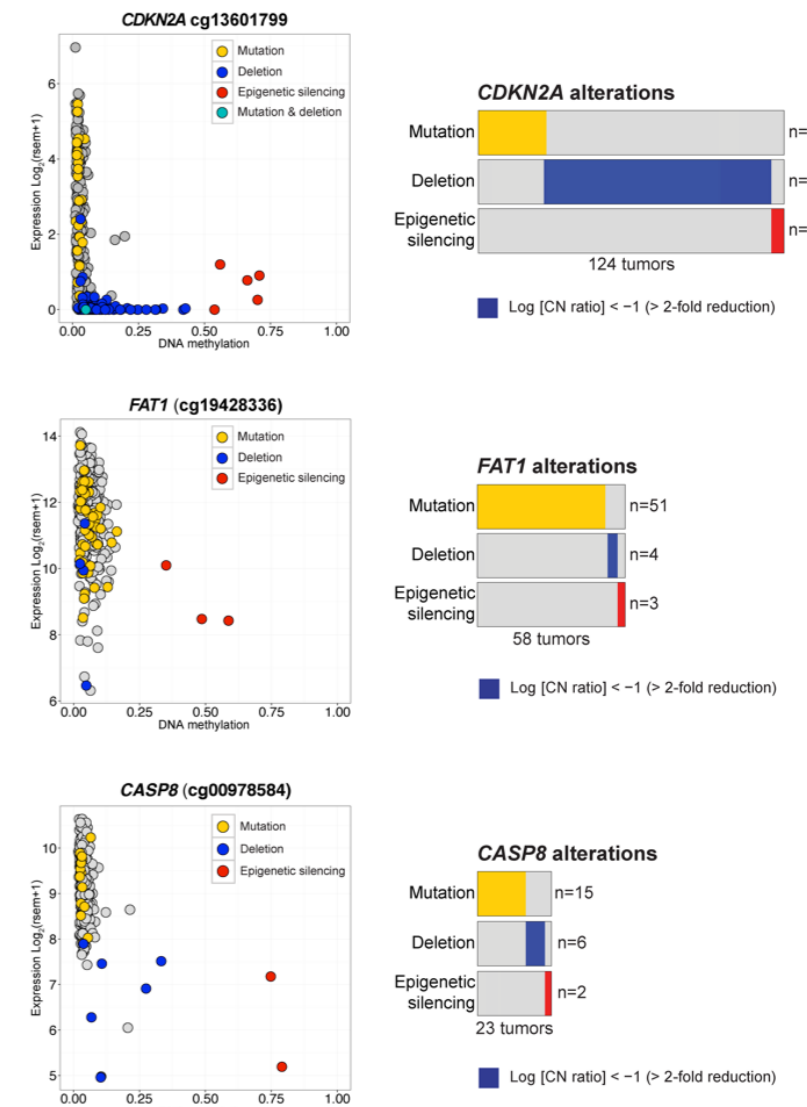

**C**

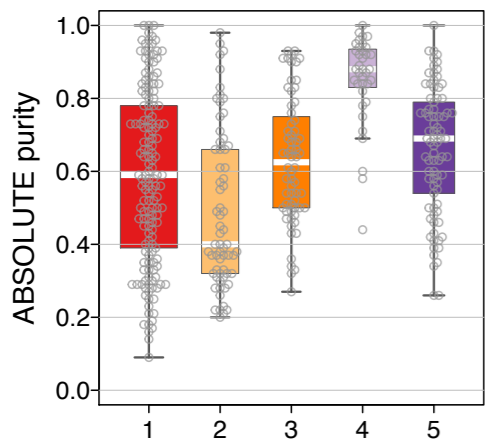

**D**

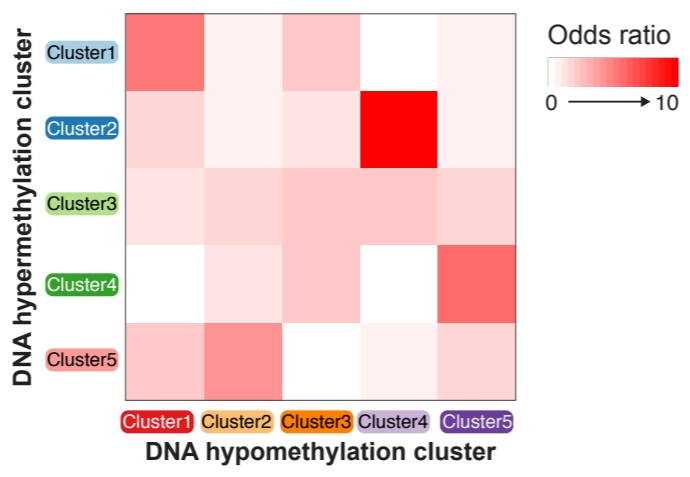

**E**

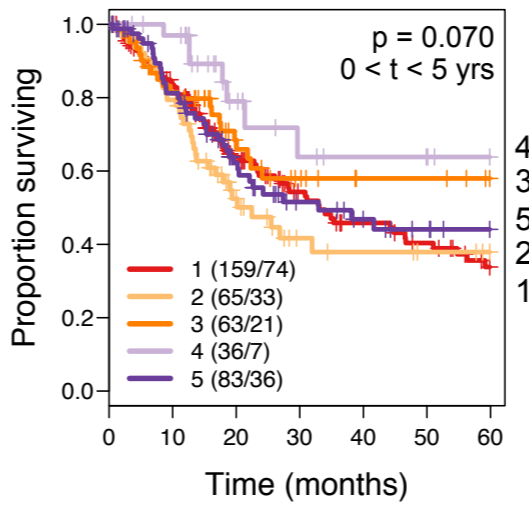

**F**

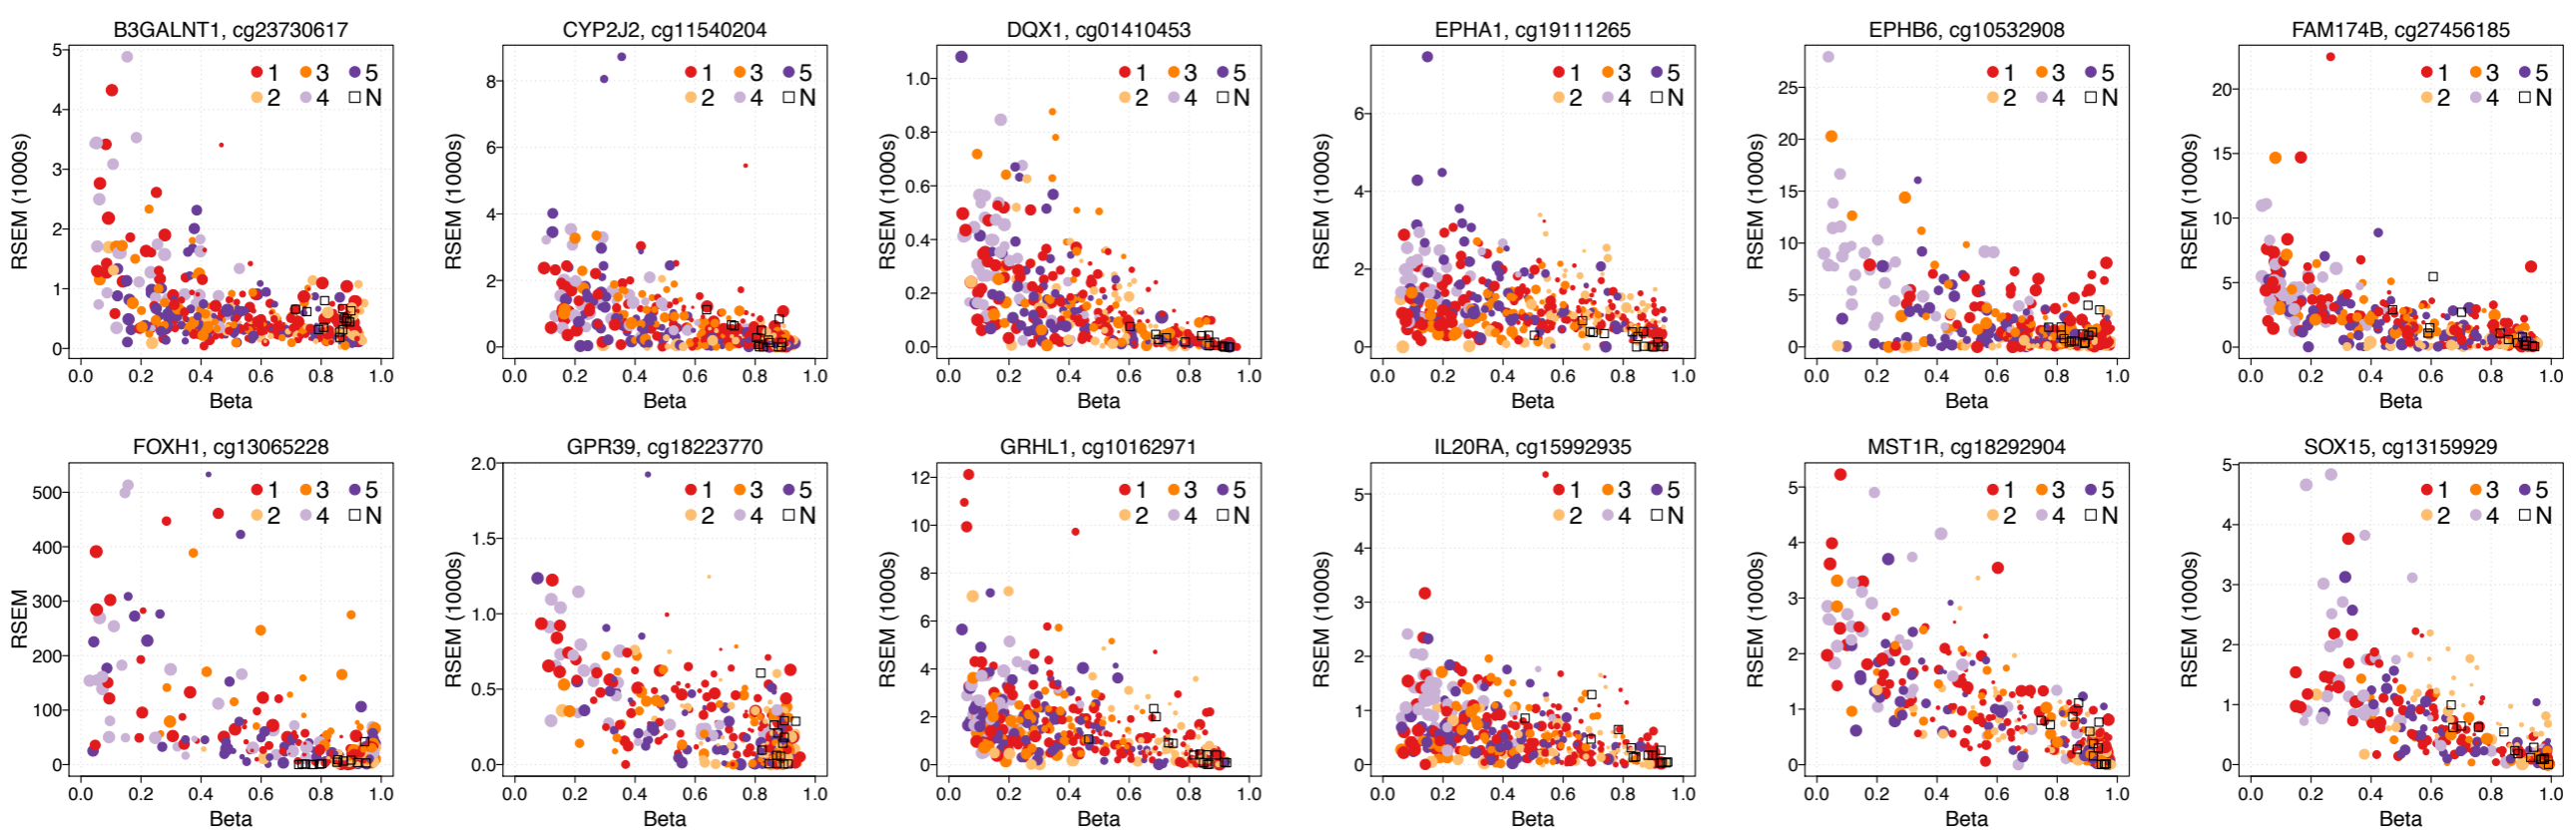

Supplement: NIHMS911030-supplement-3.pdf [file NIHMS911030-supplement-3.pdf]
